# Supplementary material
Source: PubMed Central journal article supplement (PMC5310603)
Supplement: rspb20162232supp2.pdf [file rspb20162232supp2.pdf]

ESM2. The sequences and amplifications efficiencies of primers used in the qPCR analysis.

| Gene         | Primer For             | Primer Rev              | Efficiency<br>wing | Efficiency<br>lymph<br>node |
|--------------|------------------------|-------------------------|--------------------|-----------------------------|
| <i>Aup1</i>  | GCTCAAAGAGTCAAGGAGGTT  | GCTACAGCTCCCTCAAGTAAAT  | 106 %              | 106 %                       |
| <i>Il6</i>   | CACCGGTCTTCTGGAGTTTC   | CAGGGCTTTGGTTCCTATCTT   | 106 %              | 110 %                       |
| <i>Il17a</i> | GCCCAAATACTGAGGACAAGA  | AGGTGGACCGTTTGTAGTAATC  | N/A                | 130 %                       |
| <i>Il1b</i>  | GGAAATCAGGGACAAGGTAGAA | TATCCTGGCCACCCTTAGTA    | 139 %              | 126 %                       |
| <i>Il4</i>   | ATTCCAGCTCTGATCTGCTTAC | TGTGAGGACGTTTCAGCATTT   | N/A                | 108 %                       |
| <i>Ifng</i>  | CAAGGAAGAGCTGCGTGTTA   | CCCTCTGATCATTACTGGAGTTT | N/A                | 120 %                       |
