# Supplementary material
Source: PubMed Central journal article supplement (PMC5310603)
Supplement: rspb20162232supp3.pdf [file rspb20162232supp3.pdf]

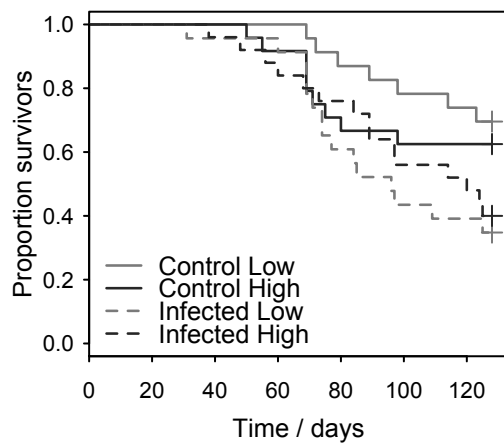

ESM3. Survival curves of *M. lucifugus* under *Pd*-infection, grouped by pre-hibernation anti-*Pd*-titers into high and low groups. Survival was significantly lower in the infected bats compared to control bats, but there were no differences between titers.
