# Supplementary material
Source: PubMed Central journal article supplement (PMC5310603)
Supplement: rspb20162232supp4.pdf [file rspb20162232supp4.pdf]

ESM4. Table of alternative models for the post-hibernation titer and relative mRNA expression of cytokine genes including post-hibernation SMI and time to euthanasia as covariates. Type II sums of squares were obtained with function Anova from package car, and estimates and standard errors for the main effects with function lm in R. Effects that were not included in the final models are shown in parentheses. Significant effects ( $p < 0.05$ ) are shown in bold. No significant effects on *Il-4* were found. *Ifn $\gamma$*  expression was below detection level in most individuals.

| Response variable              | Independent variables                                      | Type II Sum Sq | Df       | F            | Estimate $\pm$ SE                 | Pr(>F)              |
|--------------------------------|------------------------------------------------------------|----------------|----------|--------------|-----------------------------------|---------------------|
| February anti- <i>Pd</i> titer | <b>September titer (high vs. low)</b>                      | <b>1454.48</b> | <b>1</b> | <b>54.70</b> | <b>-34.34<math>\pm</math>5.59</b> | <b>9.53E-08 ***</b> |
|                                | <b>Infection</b>                                           | <b>760.64</b>  | <b>1</b> | <b>28.61</b> | <b>25.46<math>\pm</math>3.12</b>  | <b>1.52E-05 ***</b> |
|                                | <b>Time to euthanasia</b>                                  | <b>127.05</b>  | <b>1</b> | <b>4.78</b>  | <b>-0.43<math>\pm</math>0.07</b>  | <b>3.84E-02 *</b>   |
|                                | Post-hibernation SMI                                       | 41.49          | 1        | 1.56         | -1.47 $\pm$ 1.17                  | 2.23E-01            |
|                                | <b>September titer (high vs. low) x Infection</b>          | <b>1007.48</b> | <b>1</b> | <b>37.89</b> | <b>-24.97<math>\pm</math>4.05</b> | <b>1.95E-06 ***</b> |
|                                | <b>September titer (high vs. low) x Time to euthanasia</b> | <b>798.15</b>  | <b>1</b> | <b>30.02</b> | <b>0.47<math>\pm</math>0.08</b>   | <b>1.09E-05 ***</b> |
|                                | (September titer (high vs. low) x Post-hibernation SMI)    | 18.62          | 1        | 0.68         | 2.94 $\pm$ 3.55                   | 4.17E-01            |
|                                | (Infection x Time to euthanasia)                           | 3.75           | 1        | 0.14         | 0.04 $\pm$ 0.12                   | 7.14E-01            |
|                                | (Infection x post-hibernation SMI)                         | 0.67           | 1        | 0.02         | -0.53 $\pm$ 3.39                  | 8.77E-01            |
|                                | Residuals                                                  | 664.73         | 25       |              |                                   |                     |
| Interleukin-6, wing            | <b>Infection</b>                                           | <b>4.80</b>    | <b>1</b> | <b>6.977</b> | <b>0.78<math>\pm</math>0.3</b>    | <b>1.28E-02 *</b>   |
|                                | <b>Post-hibernation SMI</b>                                | <b>6.05</b>    | <b>1</b> | <b>8.792</b> | <b>0.52<math>\pm</math>0.17</b>   | <b>5.78E-03 **</b>  |
|                                | (Time to euthanasia)                                       | 0.30           | 1        | 0.400        | 0.007 $\pm$ 0.008                 | 5.31E-01            |
|                                | (Infection x Time to euthanasia)                           | 0.31           | 1        | 0.42         | -0.008 $\pm$ 0.012                | 5.22E-01            |
|                                | (Infection x post-hibernation SMI)                         | 0.11           | 1        | 0.15         | 0.15 $\pm$ 0.38                   | 6.97E-01            |
|                                | Residuals                                                  | 21.35          | 31       |              |                                   |                     |
| Interleukin-1 $\beta$ , wing   | Infection                                                  | 0.58           | 1        | 1.46         | 0.28 $\pm$ 0.23                   | 2.36E-01            |
|                                | <b>Post-hibernation SMI</b>                                | <b>3.08</b>    | <b>1</b> | <b>7.71</b>  | <b>0.36<math>\pm</math>0.13</b>   | <b>9.24E-03 **</b>  |
|                                | (Time to euthanasia)                                       | 0.3046         | 1        | 0.77         | 0.001 $\pm$ 0.006                 | 3.88E-01            |
|                                | (Infection x Time to euthanasia)                           | 0.94           | 1        | 2.37         | -0.01 $\pm$ 0.01                  | 1.35E-01            |
|                                | (Infection x post-hibernation SMI)                         | 0.10           | 1        | 0.24         | 0.13 $\pm$ 0.27                   | 6.26E-01            |
|                                | Residuals                                                  | 12.38          | 31       |              |                                   |                     |
| Interleukin-6, lymph node      | <b>Infection</b>                                           | <b>1.82</b>    | <b>1</b> | <b>5.71</b>  | <b>0.53<math>\pm</math>0.22</b>   | <b>2.47E-02 *</b>   |
|                                | Post-hibernation SMI                                       | 1.34           | 1        | 4.22         | -0.27 $\pm$ 0.13                  | 5.06E-02 .          |
|                                | (Time to euthanasia)                                       | 0.21           | 1        | 0.61         | -0.002 $\pm$ 0.006                | 4.42E-01            |
|                                | (Infection x Time to euthanasia)                           | 0.09           | 1        | 0.20         | -0.004 $\pm$ 0.01                 | 6.61E-01            |
|                                | (Infection x post-hibernation SMI)                         | 0.04           | 1        | 0.12         | -0.10 $\pm$ 0.29                  | 7.29E-01            |
|                                | Residuals                                                  | 7.96           | 25       |              |                                   |                     |
| Interleukin-17A, lymph node    | <b>Infection</b>                                           | <b>8.81</b>    | <b>1</b> | <b>8.92</b>  | <b>1.15<math>\pm</math>0.39</b>   | <b>6.23E-03 **</b>  |
|                                | Post-hibernation SMI                                       | 1.13           | 1        | 1.15         | -0.24 $\pm$ 0.22                  | 2.94E-01            |
|                                | (Time to euthanasia)                                       | 0.27           | 1        | 0.26         | -0.01 $\pm$ 0.01                  | 6.18E-01            |
|                                | (Infection x Time to euthanasia)                           | 0.85           | 1        | 0.79         | -0.01 $\pm$ 0.02                  | 3.83E-01            |
|                                | (Infection x post-hibernation SMI)                         | 0.26           | 1        | 0.24         | -0.24 $\pm$ 0.48                  | 6.26E-01            |
|                                | Residuals                                                  | 24.68          | 25       |              |                                   |                     |
