# Supplementary material
Source: PubMed Central journal article supplement (PMC5310603)
Supplement: rspb20162232supp5.pdf [file rspb20162232supp5.pdf]

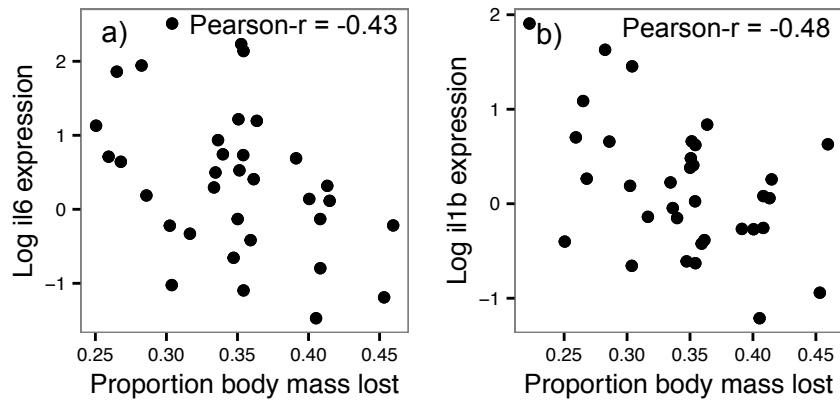

ESM5. The normalized mRNA expression in the wing tissue of both uninfected and *Pd*-infected bats is compared to the proportion of SMI lost during hibernation for both a) *Il6* and b) *Il1b*.
