# Supplementary material
Source: PubMed Central journal article supplement (PMC5310603)
Supplement: rspb20162232supp6.pdf [file rspb20162232supp6.pdf]

ESM6. Table of final models for the post-hibernation titer and relative mRNA expression of cytokine genes with Type II sums of squares. Estimates and standard errors for the main effects were obtained from linear model using function lm in R. Covariates and interactions not included in the final models are shown in parentheses. Significant effects ( $p < 0.05$ ) are shown in bold. *Ifng* expression was below detection level in most individuals.

| Response variable              | Independent variables                                             | Type II Sum Sq | Df       | F            | Estimate ±SE        | Pr(>F)          |            |
|--------------------------------|-------------------------------------------------------------------|----------------|----------|--------------|---------------------|-----------------|------------|
| February anti- <i>Pd</i> titer | <b>Pre-hibernation titer (high vs. low)</b>                       | <b>1204.76</b> | <b>1</b> | <b>59.08</b> | <b>1.68±14.23</b>   | <b>6.36E-08</b> | <b>***</b> |
|                                | <b>Infection</b>                                                  | <b>772.26</b>  | <b>1</b> | <b>37.87</b> | <b>28.45±2.92</b>   | <b>2.34E-06</b> | <b>***</b> |
|                                | <b>Time to euthanasia</b>                                         | <b>114.78</b>  | <b>1</b> | <b>5.63</b>  | <b>-0.39±0.07</b>   | <b>2.60E-02</b> | <b>*</b>   |
|                                | Proportion SMI lost                                               | 84.27          | 1        | 4.13         | 87.85±29.96         | 5.33E-02        | .          |
|                                | <b>Pre-hibernation titer (high vs. low) x Infection</b>           | <b>1165.77</b> | <b>1</b> | <b>57.16</b> | <b>-27.79±3.68</b>  | <b>8.45E-08</b> | <b>***</b> |
|                                | <b>Pre-hibernation titer (high vs. low) x Proportion SMI lost</b> | <b>132.51</b>  | <b>1</b> | <b>6.50</b>  | <b>-85.54±33.56</b> | <b>1.76E-02</b> | <b>*</b>   |
|                                | <b>Pre-hibernation titer (high vs. low) x Time to euthanasia</b>  | <b>574.26</b>  | <b>1</b> | <b>28.16</b> | <b>0.41±0.08</b>    | <b>1.92E-05</b> | <b>***</b> |
|                                | (Infection x Time to euthanasia)                                  | 0.85           | 1        | 0.04         | -0.02±0.08          | 8.41E-01        |            |
|                                | (Infection x Proportion SMI lost)                                 | 38.45          | 1        | 1.88         | -55.43±40.46        | 1.85E-01        |            |
|                                | Residuals                                                         | 489.45         | 24       |              |                     |                 |            |
| Interleukin-6, wing            | <b>Infection</b>                                                  | <b>4.72</b>    | <b>1</b> | <b>6.50</b>  | <b>0.77±0.3</b>     | <b>1.60E-02</b> | <b>*</b>   |
|                                | <b>Proportion SMI lost</b>                                        | <b>4.86</b>    | <b>1</b> | <b>6.69</b>  | <b>-7.23±2.8</b>    | <b>1.46E-02</b> | <b>*</b>   |
|                                | (Time to euthanasia)                                              | 0.76           | 1        | 1.00         | 0.01±0.01           | 3.27E-01        |            |
|                                | (Infection x Time to euthanasia)                                  | 0.052          | 1        | 0.07         | -0.003±0.01         | 7.95E-01        |            |
|                                | (Infection x Proportion SMI lost)                                 | 0.047          | 1        | 0.61         | -4.97±6.38          | 4.43E-01        |            |
|                                | Residuals                                                         | 22.54          | 31       |              |                     |                 |            |
| Interleukin-1 $\beta$ , wing   | Infection                                                         | 0.71           | 1        | 1.87         | 0.30±0.22           | 1.82E-01        |            |
|                                | <b>Proportion SMI lost</b>                                        | <b>3.58</b>    | <b>1</b> | <b>9.36</b>  | <b>-5.73±1.87</b>   | <b>4.54E-03</b> | <b>**</b>  |
|                                | (Time to euthanasia)                                              | 0.16           | 1        | 0.42         | 0.001±0.006         | 5.22E-01        |            |

|                             |                                   |             |          |             |                    |                 |           |
|-----------------------------|-----------------------------------|-------------|----------|-------------|--------------------|-----------------|-----------|
|                             | (Infection x Time to euthanasia)  | 0.51        | 1        | 1.33        | -0.01±0.01         | 2.58E-01        |           |
|                             | (Infection x Proportion SMI lost) | 0.47        | 1        | 1.23        | -4.85±4.37         | 2.77E-01        |           |
|                             | Residuals                         | 11.87       | 31       |             |                    |                 |           |
| Interleukin-6, lymph node   | <b>Infection</b>                  | <b>1.65</b> | <b>1</b> | <b>4.68</b> | <b>0.50 ± 0.24</b> | <b>4.02E-02</b> | <b>*</b>  |
|                             | Proportion SMI lost               | 0.49        | 1        | 1.40        | 2.89 ± 2.45        | 2.48E-01        |           |
|                             | (Time to euthanasia)              | 0.40        | 1        | 1.06        | -0.002±0.01        | 3.14E-01        |           |
|                             | (Infection x Time to euthanasia)  | 0.21        | 1        | 0.56        | -0.007±0.01        | 4.60E-01        |           |
|                             | (Infection x Proportion SMI lost) | 0.00        | 1        | 0.01        | -0.38±5.19         | 9.42E-01        |           |
|                             | Residuals                         | 8.81        | 25       |             |                    |                 |           |
| Interleukin-17A, lymph node | <b>Infection</b>                  | <b>8.25</b> | <b>1</b> | <b>7.99</b> | <b>1.11±0.39</b>   | <b>9.10E-03</b> | <b>**</b> |
|                             | Proportion SMI lost               | 0.01        | 1        | 0.01        | 0.34±3.78          | 9.29E-01        |           |
|                             | (Time to euthanasia)              | 0.75        | 1        | 0.71        | -0.01±0.01         | 4.08E-01        |           |
|                             | (Infection x Time to euthanasia)  | 0.67        | 1        | 0.64        | 0.01±0.02          | 4.33E-01        |           |
|                             | (Infection x Proportion SMI lost) | 1.46        | 1        | 1.39        | 9.34±7.95          | 2.52E-01        |           |
|                             | Residuals                         | 25.80       | 25       |             |                    |                 |           |
| Interleukin-4, lymph node   | Infection                         | 1.09        | 1        | 2.38        | 0.38±0.24          | 1.34E-01        |           |
|                             | Proportion SMI lost               | 0.02        | 1        | 0.04        | 0.45±2.30          | 8.45E-01        |           |
|                             | (Time to euthanasia)              | 0.002       | 1        | 0.37        | -0.01±0.01         | 5.47E-01        |           |
|                             | (Infection x Time to euthanasia)  | 0.80        | 1        | 1.69        | 0.01±0.01          | 2.05E-01        |           |
|                             | (Infection x Proportion SMI lost) | 0.16        | 1        | 0.34        | 2.92±5.03          | 5.66E-01        |           |
|                             | Residuals                         | 13.29       | 29       |             |                    |                 |           |
