# Supplementary material
Source: PubMed Central journal article supplement (PMC5310603)
Supplement: rspb20162232supp7.pdf [file rspb20162232supp7.pdf]

ESM3. Linear mixed model table for the February (post-hibernation) anti-*Pd* titer and relative mRNA expression of cytokine genes with Type II Wald chisquare tests (package car). Models were fit by maximum likelihood using function lmer in R. Significant effects are shown in bold.

| Response variable           | Fixed effects                                | Type II Wald Chisq | Df | t            | Estimate ± SE       | Pr(>Chisq)           | Random effects | Variance | SD    |
|-----------------------------|----------------------------------------------|--------------------|----|--------------|---------------------|----------------------|----------------|----------|-------|
| February titer              | Intercept                                    |                    | 1  | 0.77         | 8.06±1.41           |                      | Cage           | 0        | 0     |
|                             | <b>September titer</b>                       | <b>78.77</b>       | 1  | <b>0.14</b>  | <b>1.68±12.33</b>   | <b>2.20E-16</b> ***  | Residual       | 15.30    | 3.91  |
|                             | <b>Infection</b>                             | <b>50.49</b>       | 1  | <b>11.25</b> | <b>28.45±2.53</b>   | <b>1.20E-12</b> ***  |                |          |       |
|                             | <b>Time to euthanasia</b>                    | <b>7.50</b>        | 1  | <b>-6.68</b> | <b>-0.39±0.06</b>   | <b>6.15E-03</b> **   |                |          |       |
|                             | <b>Proportion SMI lost</b>                   | <b>5.51</b>        | 1  | <b>3.76</b>  | <b>87.85±23.35</b>  | <b>1.89E-02</b> *    |                |          |       |
|                             | <b>September titer x infection</b>           | <b>76.22</b>       | 1  | <b>-8.73</b> | <b>-27.79±3.18</b>  | <b>2.20E-16</b> ***  |                |          |       |
|                             | <b>September titer x Proportion SMI lost</b> | <b>8.66</b>        | 1  | <b>-2.94</b> | <b>-85.54±29.16</b> | <b>3.25E-03</b> **   |                |          |       |
|                             | <b>September titer x Time to euthanasia</b>  | <b>37.55</b>       | 1  | <b>6.127</b> | <b>0.41±0.07</b>    | <b>8.931E-10</b> *** |                |          |       |
|                             | Interleukin-6, wing                          | Intercept          |    |              | 2.70                | 2.62±0.96            |                | Cage     | 0.004 |
| <b>Infection</b>            |                                              | <b>6.95</b>        | 1  | <b>2.63</b>  | <b>0.77±0.29</b>    | <b>8.37E-03</b> **   | Residual       | 0.66     | 0.81  |
| <b>Proportion SMI lost</b>  |                                              | <b>7.29</b>        | 1  | <b>-2.70</b> | <b>-7.23±2.68</b>   | <b>6.92E-03</b> **   |                |          |       |
| Interleukin-1β, wing        | Intercept                                    |                    |    | 3.41         | 2.27±0.66           |                      | Cage           | 0.04     | 0.21  |
|                             | Infection                                    | 1.01               | 1  | 1.01         | 0.25±0.25           | 3.14E-01             | Residual       | 0.30     | 0.55  |
|                             | <b>Proportion SMI lost</b>                   | <b>11.45</b>       | 1  | <b>-3.38</b> | <b>-6.22±1.84</b>   | <b>7.15E-04</b> ***  |                |          |       |
| Interleukin-6, lymph node   | Intercept                                    |                    |    | -1.43        | -1.22±0.85          |                      | Cage           | 0        | 0     |
|                             | <b>Infection</b>                             | <b>5.24</b>        | 1  | <b>2.29</b>  | <b>0.51±0.22</b>    | <b>2.20E-02</b> *    | Residual       | 0.31     | 0.56  |
|                             | Proportion SMI lost                          | 1.56               | 1  | 1.25         | 2.9±2.31            | 2.11E-01             |                |          |       |
| Interleukin-17A, lymph node | Intercept                                    |                    |    | -0.41        | -0.35±1.25          |                      | Cage           | 0.003    | 0.06  |
|                             | <b>Infection</b>                             | <b>8.89</b>        | 1  | <b>1.62</b>  | <b>1.11±0.37</b>    | <b>2.86E-03</b> **   | Residual       | 0.92     | 0.96  |
|                             | Proportion SMI lost                          | 0.01               | 1  | 0.2          | 0.33±3.57           | 9.26E-01             |                |          |       |
